# Supplementary material
Source: PubMed Central journal article supplement (PMC6370305)
Supplement: NIHMS1008671-supplement-figures.pdf [file NIHMS1008671-supplement-figures.pdf]

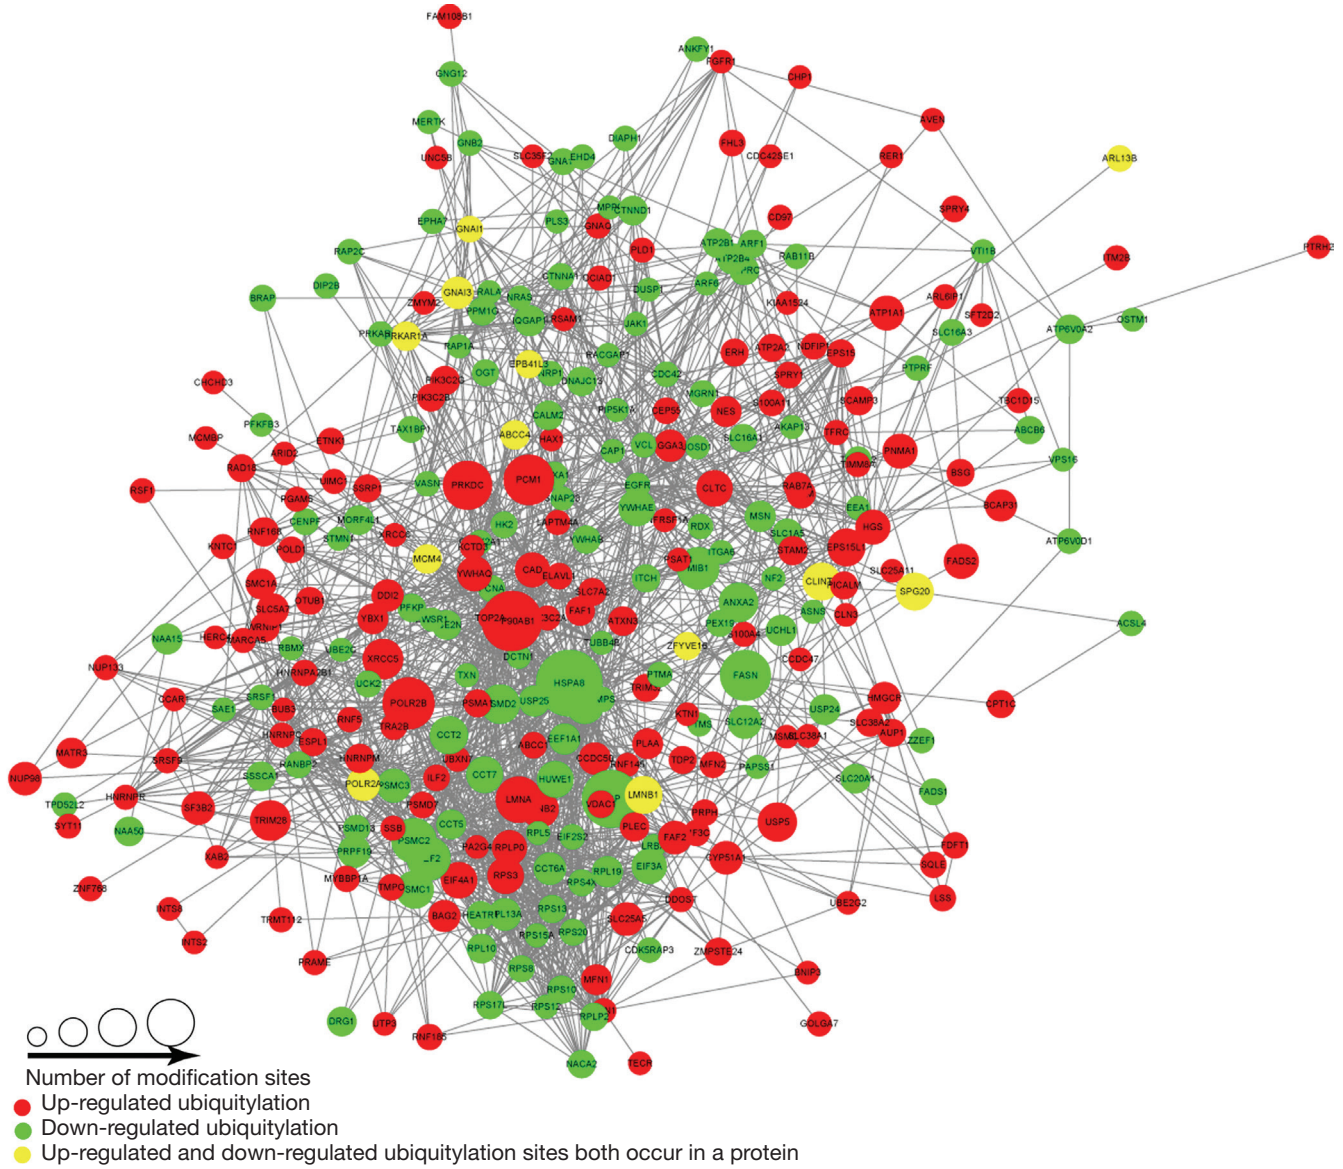

**Figure S1** Protein-protein interaction network of differentially quantified Kub (lysine ubiquitination) proteins in perifosine-treated AS cells.

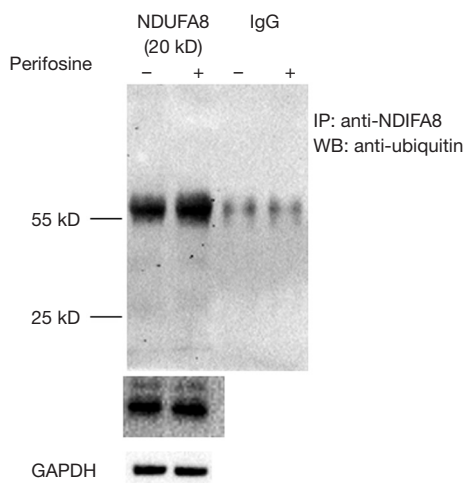

**Figure S2** Detection of ubiquitylation of NDUFA8. Co-IP and western blotting were used to validate ubiquitylome, resulting increase of ubiquitylated NDUFA8 after 10  $\mu$ M perifosine treatment.

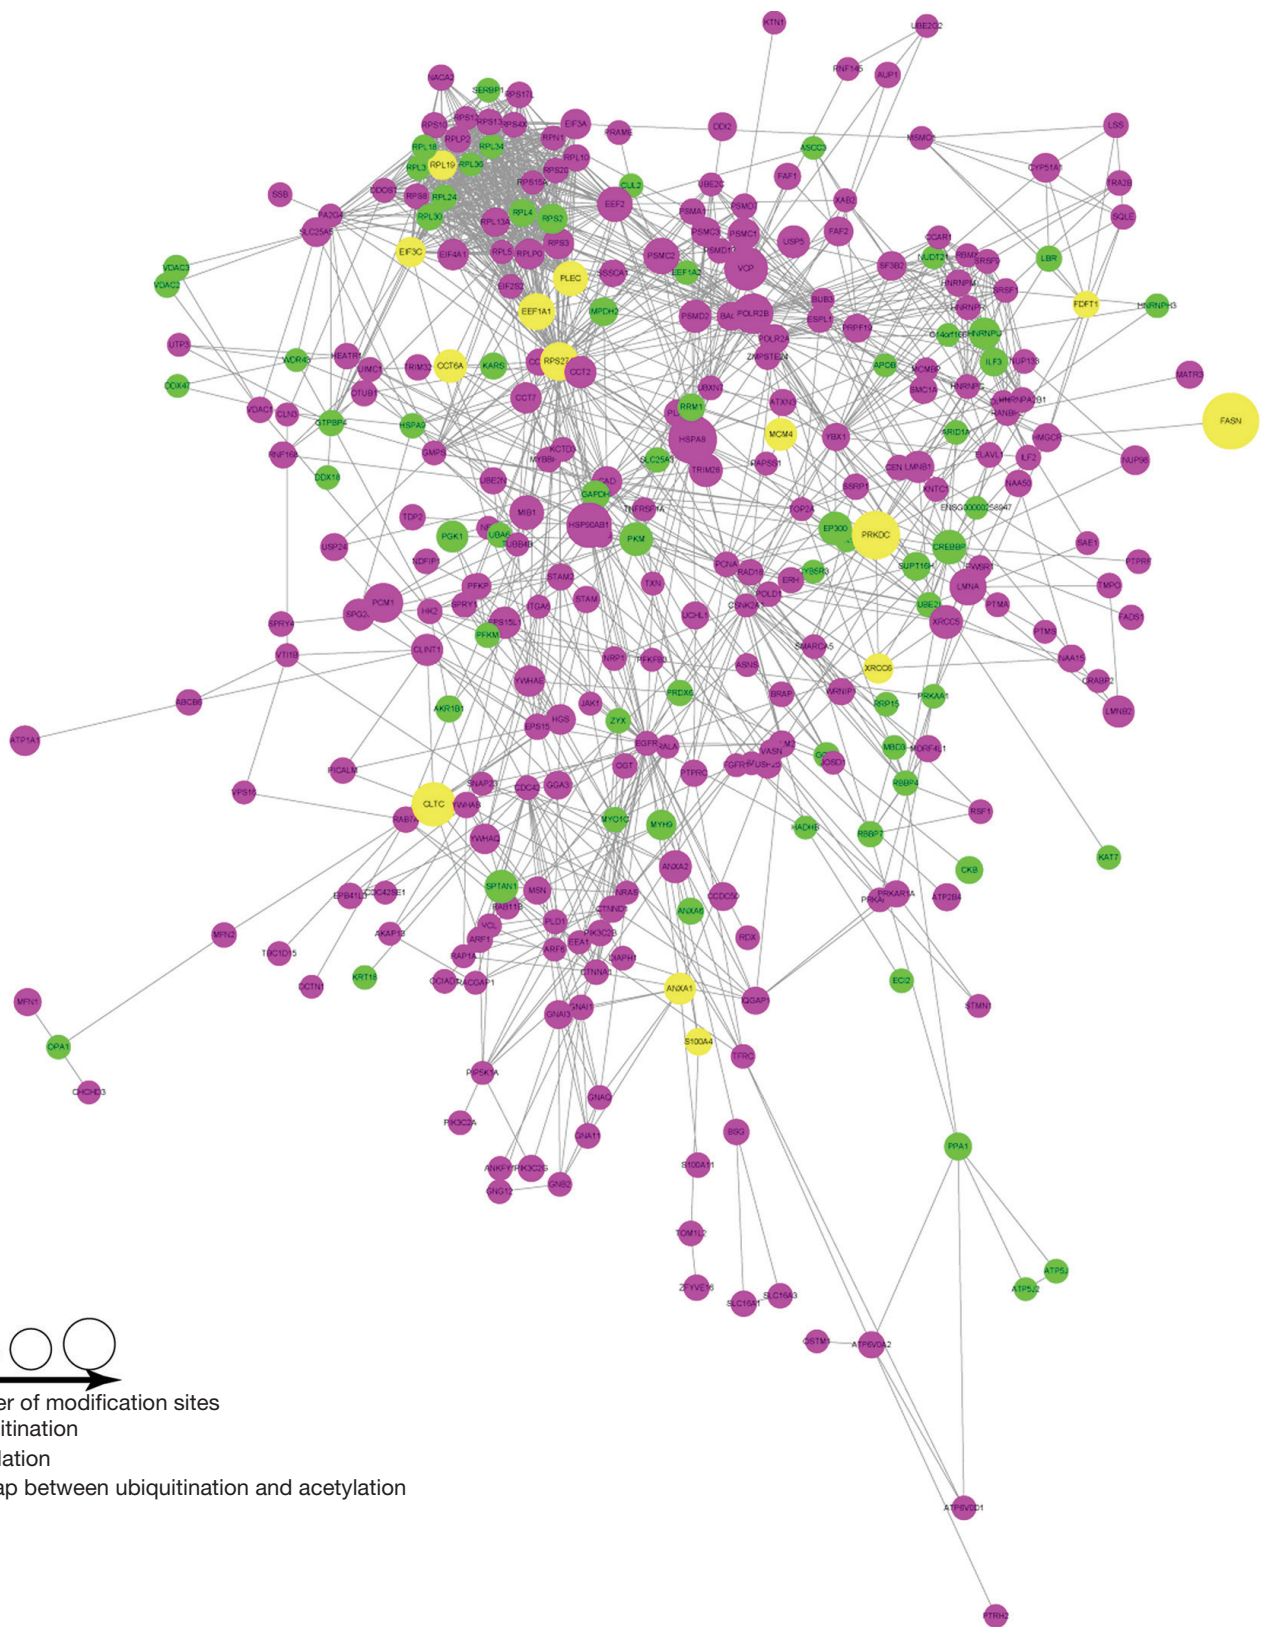

**Figure S3** Protein-protein interaction network of differentially quantified Kub (lysine ubiquitination) and Kac (lysine acetylation) proteins in perifosine-treated AS cells.
